# Supplementary material for: One-Step Fabrication of Nickel-Electrochemically Reduced Graphene Oxide Nanocomposites Modified Electrodes and Application to the Detection of Sunset Yellow in Drinks
Source: MDPI journal article supplement (doi:10.3390/app12052614), 2022-03-03
Supplement: s1 [file s1]

Supplementary material

# One-Step Fabrication of Nickel-Electrochemically Reduced Graphene Oxide Nanocomposites Modified Electrodes And Application to the Detection of Sunset Yellow in Drinks

Quang-Trung Nguyen <sup>1</sup>, Truong-Giang Le <sup>2</sup>, Philippe Bergonzo <sup>3,4\*</sup> and Quang-Thuan Tran <sup>1,\*</sup>

<sup>1</sup> Center for Research and Technology Transfer (CRETECH), Vietnam Academy of Science and Technology (VAST), 18 Hoang Quoc Viet, Hanoi 11300, Vietnam,

<sup>2</sup> Institute of Chemistry, Vietnam Academy of Science and Technology (VAST), 18 Hoang Quoc Viet, Cau Giay District, Hanoi 113000, Vietnam

<sup>3</sup> Electronic and Electrical Engineering Department, University College London, London WC1E 7JE, UK,

<sup>4</sup> Seki Diamond Systems, San-Jose, CA 95131, USA

\* Correspondence: tranquangthuan2008@gmail.com; p.bergonzo@ucl.ac.uk.

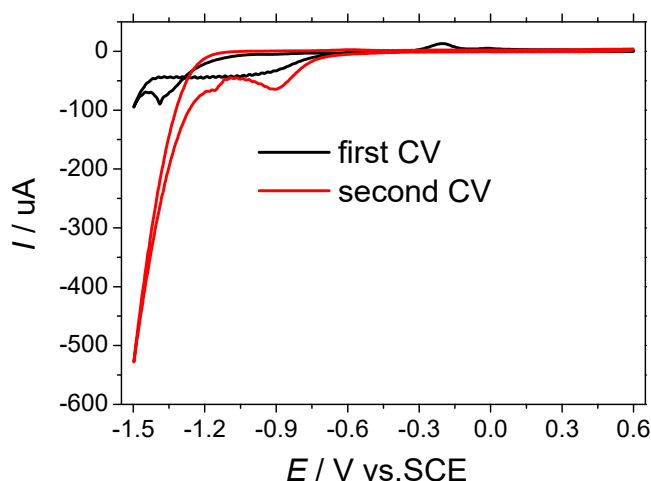

**Figure S1.** First and second CVs (scan rate = 50 mV s<sup>-1</sup>) of GCE in 0.1 M LiClO<sub>4</sub> containing 1 mg ml<sup>-1</sup> GO + 0.5 mM NiCl<sub>2</sub>.

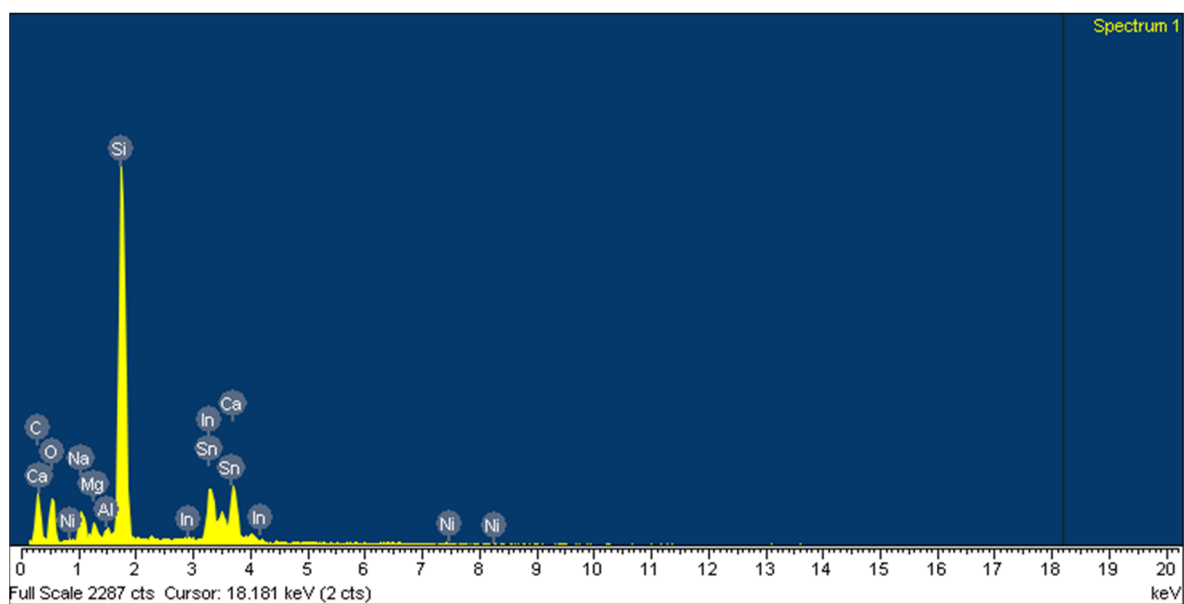

**Figure S2.** EDX of ERGO-NiNPs deposited onto ITO substrate using 10 CV scans between  $+0.6 \div -1.5$  V/SCE in 0.1 M  $\text{LiClO}_4$  electrolyte solution containing  $1 \text{ (mg mL}^{-1}\text{)}$  GO + 0.5 mM  $\text{NiCl}_2$ .

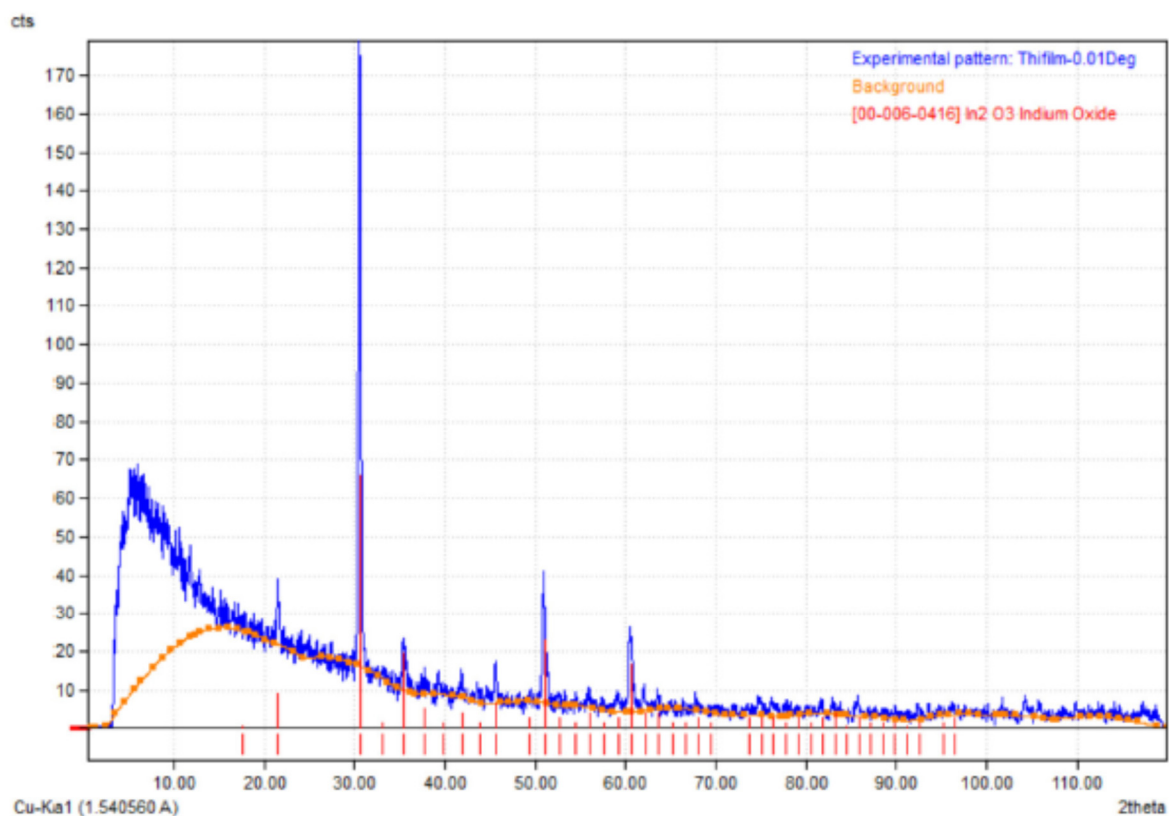

PDF-2 Database Copyright International Centre for Diffraction Data (ICDD)  
Match! Copyright © 2003-2018 CRYSTAL IMPACT, Bonn, Germany

**Figure S3.** XRD pattern of ERGO-NiNPs deposited onto ITO substrate using 10 CV scans between  $+0.6 \div -1.5$  V/SCE in 0.1 M  $\text{LiClO}_4$  electrolyte solution containing  $1 \text{ (mg mL}^{-1}\text{)}$  GO + 0.5 mM  $\text{NiCl}_2$ .

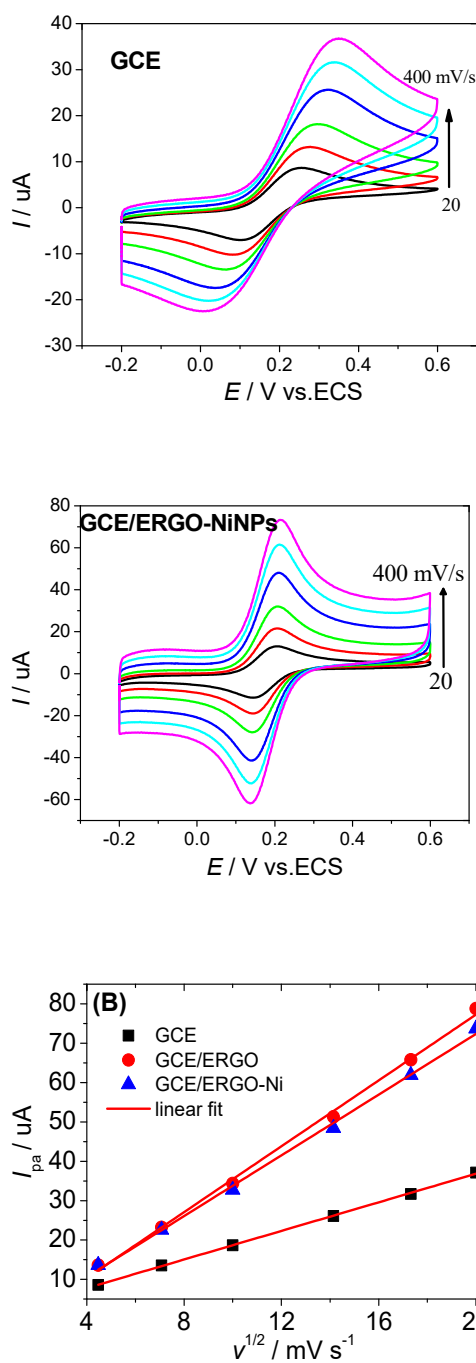

**Figure S4.** Cyclic voltammograms of GCE, GCE/ERGO and GCE/ERGO-NiNPs in 0.1 mM KCl + 1 mM  $\text{K}_3\text{Fe}(\text{CN})_6/\text{K}_4\text{Fe}(\text{CN})_6$  with the scan rate varying from 20 to 400  $\text{mV s}^{-1}$  namely, 20 (black), 50 (red), 100 (green), 200 (blue), 300 (cyan), 400 (magenta)  $\text{mV s}^{-1}$ . And (B) Variation of the peak currents towards square root of the scan rate.

The electrochemically active surface areas (ECSA) could be calculated according to Randles-Sevcik equation:

$$I_{pa} = 2.69 \times 10^5 n^3 / 2AD^{1/2}Cv^{1/2}$$

where  $I_{pa}$  is the anodic peak current (A);  $n$  is the number of electron transferred (here  $n = 1$ ),  $A$  is the electrochemical surface area ( $\text{cm}^2$ ),  $D$  ( $7.6 \times 10^{-6} \text{ cm}^2 \text{ s}^{-1}$ ) is the diffusion coefficient,  $v$  ( $\text{V s}^{-1}$ ) is the scan rate, and  $C$  ( $\text{mol dm}^{-3}$ ) is the concentration of the redox probe in bulk solution.

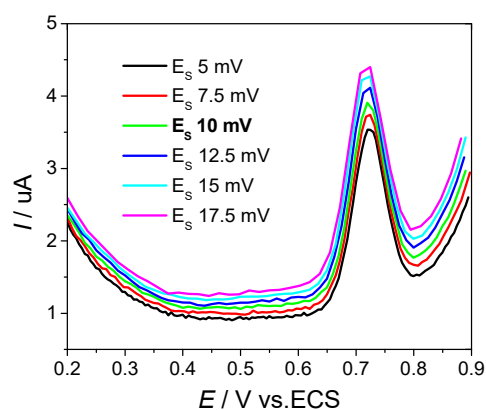

**Figure S5.** DPV of GCE/ERGO-NiNPs surface in acetate buffer pH 4 + 0.5  $\mu$ M SY at different scan rates from  $v = 10$ – $35 \text{ mV.s}^{-1}$  ( $E_s$  varying from 5 to 17.5 mV;  $t_s = 500 \text{ ms}$ ;  $E_p = 50 \text{ mV}$ ;  $t_p = 200 \text{ ms}$ ,  $I_{dt} = 100 \text{ ms}$ ). Accumulation time of 2 minutes at 0 V/SCE.

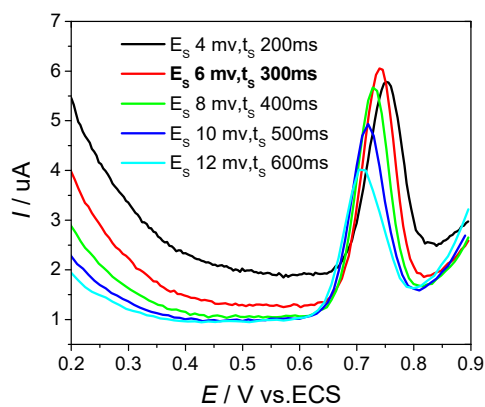

**Figure S6.** DPV of GCE/ERGO-NiNPs surface in acetate buffer pH 4 + 0.5  $\mu$ M SY at scan rate  $v = 20 \text{ mV s}^{-1}$  with different step potentials from  $E_s = 4$ – $12 \text{ mV}$ ,  $t_s/t_p/E_p/I_{dt} = 10/4/1/2$ . Accumulation time of 2 minutes at 0 V/ECS.

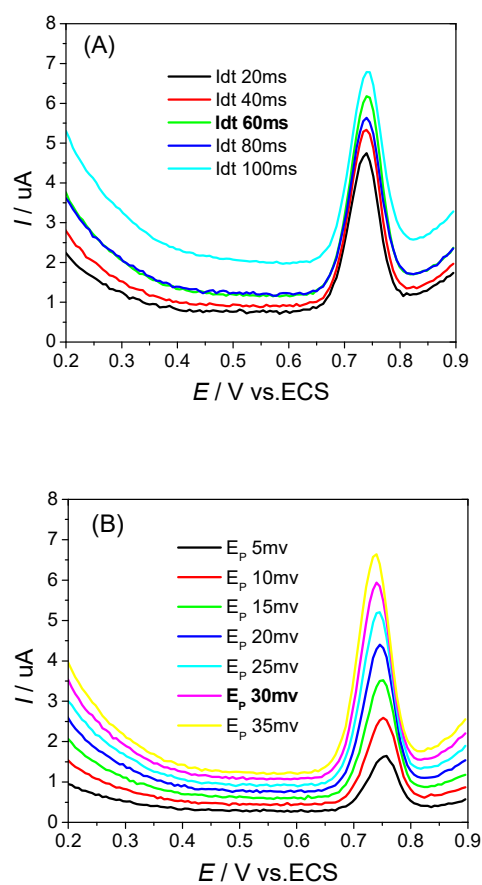

**Figure S7.** DPV of GCE/ERGO-NiNPs surface in acetate buffer pH 4 + 0.5  $\mu\text{M}$  SY at scan rate  $\nu = 20 \text{ mV s}^{-1}$ ,  $E_s = 6 \text{ mV}$ ,  $t_s = 300 \text{ ms}$ , and  $t_p = 120 \text{ ms}$ , accumulation time of 2 minutes at 0 V/ECS: (A)  $E_p = 30 \text{ mV}$  at different  $I_{dt} = 20 - 100 \text{ ms}$ . (B)  $I_{dt} = 60 \text{ ms}$  at different  $E_p = 5 - 35 \text{ mV}$ .

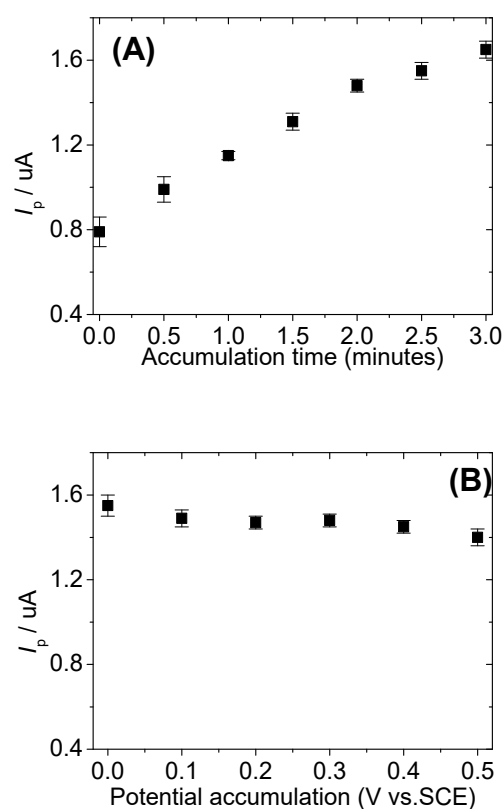

**Figure S8.** DPV responses of GCE/ERGO-NiNPs modified electrode in acetate buffer pH 4 + 0.5  $\mu M$  SY using optimised DPV parameters with scan rate  $v = 20 \text{ mV s}^{-1}$ ,  $E_s = 6 \text{ mV}$ ,  $t_s = 300 \text{ ms}$ ,  $E_p = 30 \text{ mV}$ ,  $t_p = 120 \text{ ms}$  and  $I_{dt} = 60 \text{ ms}$ : (A) variation of accumulation time at a potential accumulation of 0 V/SCE (B) variation of potential accumulation with accumulation time of 2 minutes. Error bar represents the standard deviation for three successive measurements.

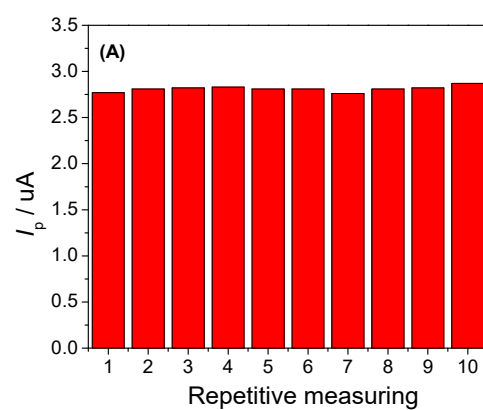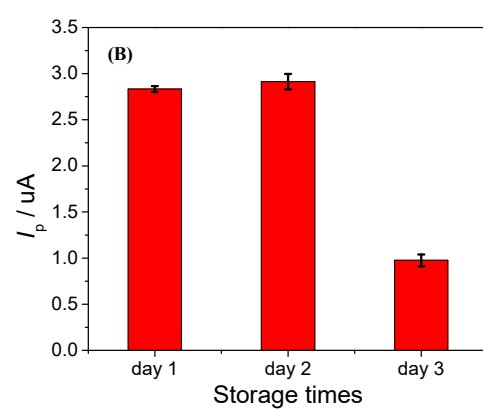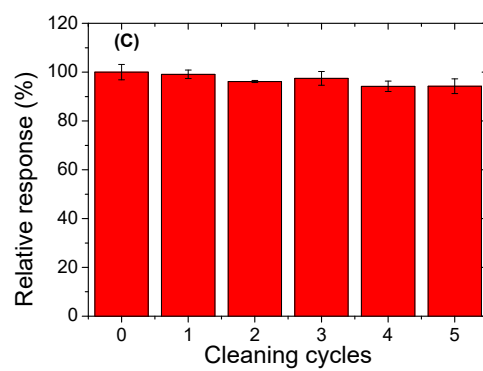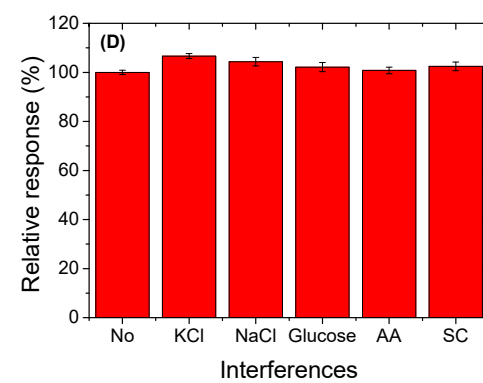

**Figure S9.** DPV response of the GCE/ERGO-NiNPs sensor in acetate buffer pH 4 + 0.5 uM SY under optimized conditions:  $v = 20 \text{ mV s}^{-1}$ ,  $E_s = 6 \text{ mV}$ ,  $t_s = 300 \text{ ms}$ ,  $E_p = 30 \text{ mV}$ ;  $t_p = 120 \text{ ms}$  and  $I_{dt} = 60 \text{ ms}$ , accumulation time of 2 minutes at 0 V/ECS. (A) Repetitive measuring (B) storage stability in buffer solution (C) repetitive measuring/cleaning cycles (D) with the presence of 100-folds concentration KCl, NaCl, acid ascobic (AA), glucose (Glu) and sodium citrate (SC).

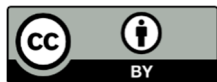

© 2022 by the authors. Submitted for possible open access publication under the terms and conditions of the Creative Commons Attribution (CC BY) license (<http://creativecommons.org/licenses/by/4.0/>).
